# Supplementary material for: Gathering, processing, and interpreting information about COVID-19
Source: PubMed Central journal article supplement (PMC7985139; doi:10.1038/s41598-021-86088-3), 2021-03-22
Supplement: 41598_2021_86088_MOESM1_ESM.pdf [file 41598_2021_86088_MOESM1_ESM.pdf]

# Gathering, Processing, and Interpreting Information About COVID-19

Arnout B. Boot, Anita Eerland, Joran Jongerling, Peter P.J.L. Verkoeijen, and Rolf A. Zwaan

## Appendix A- Supplementary Tables

Tables 1-5: Demographic Details of Prolific Research Participants (Wave 1, N = 501)

Table 1.

### *Participant Demographics: Career Field*

| <b>Category</b>                                   | <b>n</b> | <b>%</b> |
|---------------------------------------------------|----------|----------|
| Student                                           | 100      | 20.0     |
| Information Technology                            | 64       | 12.8     |
| Unemployed                                        | 56       | 11.2     |
| Health Science and Health Care                    | 46       | 9.2      |
| Marketing, Sales, and Service                     | 51       | 10.2     |
| Education and Training                            | 34       | 6.8      |
| Science, Technology, Engineering, and Mathematics | 47       | 9.4      |
| Arts, Audio/Video Technology, and Communications  | 29       | 5.8      |
| Business Management and Administration            | 22       | 4.4      |
| Finance                                           | 16       | 3.2      |
| Transportation, Distribution, and Logistics       | 14       | 2.8      |
| Manufacturing                                     | 12       | 2.4      |
| Law, Public Safety, Corrections, and Security     | 12       | 2.4      |
| Government and Public Administration              | 12       | 2.4      |
| Hospitality and Tourism                           | 10       | 2.0      |
| Human Services                                    | 9        | 1.8      |
| Agriculture, Food and Natural Resources           | 7        | 1.4      |
| Other: Retired                                    | 6        | 1.2      |
| Other: Self-employed                              | 3        | 0.6      |
| Architecture and Construction                     | 4        | 0.8      |
| Other: Military                                   | 2        | 0.4      |
| Other*                                            | 15       | 3.0      |

Note. \* Other career fields reported by individual participants: associate, aviation, blogger, building management, clergy, educational publishing, freelancer, insurance, internet analyst, risk analyst, sex worker, sports, telecoms, and writing.

Table 2.

### *Participant Demographics: Education*

| <b>Highest educational achievement</b> | <b>n</b> | <b>%</b> |
|----------------------------------------|----------|----------|
| Bachelor's degree in college (4-year)  | 155      | 30.9     |
| High school graduate                   | 119      | 23.8     |
| Some college but no degree             | 88       | 17.6     |
| Master's degree                        | 85       | 17.0     |
| Associate degree in college (2-year)   | 27       | 5.4      |
| Professional degree (JD, MD)           | 12       | 2.4      |
| Less than high school degree           | 9        | 1.8      |
| Doctoral degree                        | 6        | 1.2      |

Table 3.

*Participant Demographics: Nationality*

| <b>Nationality</b>       | <b>n</b> | <b>%</b> |
|--------------------------|----------|----------|
| United Kingdom           | 165      | 32.9     |
| United States of America | 101      | 20.2     |
| Poland                   | 63       | 12.6     |
| Portugal                 | 57       | 11.4     |
| Greece                   | 17       | 3.4      |
| Canada                   | 13       | 2.6      |
| Italy                    | 10       | 2.0      |
| Spain                    | 10       | 2.0      |
| Hungary                  | 7        | 1.4      |
| Germany                  | 6        | 1.2      |
| Netherlands              | 6        | 1.2      |
| Estonia                  | 5        | 1.0      |
| France                   | 4        | 0.8      |
| India                    | 4        | 0.8      |
| Australia                | 3        | 0.6      |
| South Africa             | 3        | 0.6      |
| Austria                  | 2        | 0.4      |
| Brazil                   | 2        | 0.4      |
| Israel                   | 2        | 0.4      |
| Other*                   | 21       | 4.2      |

Note. \* Other countries reported by individual participants: Armenia, Belgium, Chile, Colombia, Czech Republic, Denmark, Finland, Iceland, Indonesia, Ireland, Latvia, Lithuania, Mexico, New Zealand, Nigeria, Romania, Singapore, Slovenia, Switzerland, Venezuela, and Viet Nam.

Table 4.

*Participant Demographics: Native Language*

| <b>Native language</b> | <b>n</b> | <b>%</b> |
|------------------------|----------|----------|
| English                | 283      | 56.5     |
| Polish                 | 64       | 12.8     |
| Portuguese             | 57       | 11.4     |
| Greek                  | 16       | 3.2      |
| Spanish                | 13       | 2.6      |
| German                 | 9        | 1.8      |
| Italian                | 9        | 1.8      |
| Dutch                  | 7        | 1.4      |
| Hungarian              | 7        | 1.4      |
| Estonian               | 5        | 1.0      |
| French                 | 5        | 1.0      |
| Hebrew                 | 2        | 0.4      |
| Other*                 | 24       | 4.8      |

Note. \* Other native languages reported by individual participants: Afrikaans, Arabic, Armenian, Bengali, Catalan, Czech, Danish, Finnish, Hindi, Icelandic, Indonesian, Kiswahili, Korean, Latvian, Lithuanian, Malayalam, Romanian, Russian, Scottish, Slovenian, Tamil, Ukrainian, Urdu, and Vietnamese.

Table 5.

*Participant Demographics: Gender Identity*

| <b>Gender</b>        | <b>n</b> | <b>%</b> |
|----------------------|----------|----------|
| Male                 | 257      | 51.3     |
| Female               | 238      | 47.5     |
| Prefer not to say    | 2        | 0.4      |
| Transgender          | 1        | 0.2      |
| Other: not specified | 1        | 0.2      |
| Other: genderqueer   | 1        | 0.2      |
| Other: nonbinary     | 1        | 0.2      |

Tables 6-11: Cognitive Motivation and the COVID-19 Knowledge Test (Wave 1);  
Comparing Four Types of NC and NCC Groups

Table 6.

*Descriptive Statistics of Need for Cognition Score and Need for Cognitive Closure Score (N=501)*

| Scale                      | Mean   | SD    | Median | Min | Max | 95% CI           |
|----------------------------|--------|-------|--------|-----|-----|------------------|
| Need for Cognition         | 61.96  | 10.77 | 62     | 23  | 88  | [61.01, 62.90]   |
| Need for Cognitive Closure | 164.15 | 20.08 | 163    | 107 | 239 | [162.40, 165.91] |
| Order                      | 43.19  | 7.6   | 43     | 17  | 60  | [42.52, 43.85]   |
| Predictability             | 33.03  | 6.86  | 33     | 13  | 48  | [32.43, 33.63]   |
| Decisiveness               | 25.62  | 6.59  | 25     | 7   | 42  | [25.04, 26.20]   |
| Ambiguity                  | 38.75  | 5.96  | 39     | 22  | 54  | [38.23, 39.27]   |
| Closed Mindedness          | 23.56  | 5.08  | 24     | 8   | 42  | [23.12, 24.01]   |

Table 7.

Need for Cognition and Need for Cognitive Closure scores found in the current study and previous research

|                                     | <i>M (SD)</i> | <i>N</i> |
|-------------------------------------|---------------|----------|
| <b>Need for Cognition</b>           |               |          |
| Current study                       | 61.96 (10.77) | 501      |
| Furlong (1993)                      | 61.5 (11.4)   | 61       |
| Kernis, Granneman, & Barclay (1992) | 62.66 (9.17)  | 116      |
| Miller, Omens, & Delvadia (1991)    | 62.34 (9.62)  | 98       |
| Peltier & Schibrowsky (1994)        | 66.70 (9.37)  | 130      |
| <b>Need for Cognitive Closure</b>   |               |          |
| Current study                       | 3.91 (.48)    | 501      |
| Djikic, Oatley, & Moldoveanu (2013) |               | 87       |
| <i>Group 1</i>                      | 3.97 (.44)    |          |
| <i>Group 2</i>                      | 3.79 (.37)    |          |
| Roets & Van Hiel (2011)*            | 3.77 (.74)    | 1584     |

\* In this study the 41-item revision of the Need for Cognitive Closure Scale (Roets & Van Hiel, 2007) was used.

Table 8.

*COVID-19 Knowledge Test True Statements Responses; Grouped on High and Low NC and NCC*

| <b>Item veracity</b>          | <b>Knowledge Test answers</b>              | <b>NC</b> | <b>NCC</b> | <b>Mean %</b> | <b>95% CI</b> |
|-------------------------------|--------------------------------------------|-----------|------------|---------------|---------------|
| True statements<br>(12 items) | <i>"I am sure is true"</i>                 | High      | High       | 63.5          | [58.6, 68.5]  |
|                               |                                            | High      | Low        | 53.8          | [48.7, 59.0]  |
|                               |                                            | Low       | High       | 64.2          | [59.9, 68.5]  |
|                               |                                            | Low       | Low        | 47.8          | [40.5, 55.0]  |
|                               | <i>"I think this is true"</i>              | High      | High       | 25.0          | [20.7, 29.3]  |
|                               |                                            | High      | Low        | 32.3          | [27.4, 37.1]  |
|                               |                                            | Low       | High       | 23.2          | [19.0, 27.4]  |
|                               |                                            | Low       | Low        | 32.5          | [26.7, 38.3]  |
|                               | <i>"I don't know"</i>                      | High      | High       | 6.0           | [4.3, 7.8]    |
|                               |                                            | High      | Low        | 7.8           | [6.0, 9.6]    |
|                               |                                            | Low       | High       | 4.6           | [3.2, 6.1]    |
|                               |                                            | Low       | Low        | 12.5          | [8.5, 16.5]   |
|                               | <i>"I think this is <b>not</b> true"</i>   | High      | High       | 3.0           | [1.7, 4.3]    |
|                               |                                            | High      | Low        | 4.6           | [3.1, 6.0]    |
|                               |                                            | Low       | High       | 5.3           | [3.8, 6.8]    |
|                               |                                            | Low       | Low        | 5.8           | [3.9, 7.6]    |
|                               | <i>"I am sure this is <b>not</b> true"</i> | High      | High       | 2.5           | [1.1, 3.8]    |
|                               |                                            | High      | Low        | 1.5           | [0.8, 2.2]    |
|                               |                                            | Low       | High       | 2.6           | [1.5, 3.7]    |
|                               |                                            | Low       | Low        | 1.4           | [0.5, 2.4]    |

Note. High and Low NC were determined by a median split of the scores. High and Low NCC based on the lower and upper quantiles of scores. Importantly, the interquartile range of NCC scores were excluded. Thus, the values in this table represent 50% of the original sample. Group sizes are 61 (Hi-NC, Hi-NCC), 78 (Hi-NC,Lo-NCC), 61 (Lo-NC, Hi-NCC), and 52 (Lo-NC, Lo-NCC).

Table 9.

*COVID-19 Knowledge Test False Statements Responses; Grouped on High and Low NC and NCC*

| <b>Item veracity</b>           | <b>Knowledge Test answers</b>              | <b>NC</b> | <b>NCC</b> | <b>Mean %</b> | <b>95% CI</b> |
|--------------------------------|--------------------------------------------|-----------|------------|---------------|---------------|
| False statements<br>(12 items) | <i>"I am sure is true"</i>                 | High      | High       | 5.3           | [3.4, 7.3]    |
|                                |                                            | High      | Low        | 3.8           | [2.3, 5.4]    |
|                                |                                            | Low       | High       | 5.2           | [3.3, 7.1]    |
|                                |                                            | Low       | Low        | 3.4           | [1.3, 5.4]    |
|                                | <i>"I think this is true"</i>              | High      | High       | 10.5          | [8.2, 12.8]   |
|                                |                                            | High      | Low        | 11.6          | [9.9, 13.4]   |
|                                |                                            | Low       | High       | 13.1          | [10.6, 15.6]  |
|                                |                                            | Low       | Low        | 17.0          | [13.6, 20.4]  |
|                                | <i>"I don't know"</i>                      | High      | High       | 11.6          | [8.9, 14.3]   |
|                                |                                            | High      | Low        | 13.9          | [11.3, 16.5]  |
|                                |                                            | Low       | High       | 10.8          | [8.0, 13.6]   |
|                                |                                            | Low       | Low        | 20.5          | [16.2, 24.8]  |
|                                | <i>"I think this is <b>not</b> true"</i>   | High      | High       | 21.6          | [18.1, 25.1]  |
|                                |                                            | High      | Low        | 27.5          | [23.1, 31.8]  |
|                                |                                            | Low       | High       | 23.1          | [19.2, 27.0]  |
|                                |                                            | Low       | Low        | 25.0          | [20.6, 29.4]  |
|                                | <i>"I am sure this is <b>not</b> true"</i> | High      | High       | 51.0          | [46.2, 55.7]  |
|                                |                                            | High      | Low        | 43.2          | [38.8, 47.5]  |
|                                |                                            | Low       | High       | 47.8          | [42.8, 52.8]  |
|                                |                                            | Low       | Low        | 34.1          | [28.1, 40.2]  |

Note. High and Low NC were determined by a median split of the scores. High and Low NCC based on the lower and upper quantiles of scores. Importantly, the interquartile range of NCC scores were excluded. Thus, the values in this table represent 50% of the original sample. Group sizes are 61 (Hi-NC, Hi-NCC), 78 (Hi-NC,Lo-NCC), 61 (Lo-NC, Hi-NCC), and 52 (Lo-NC, Lo-NCC).

Table 10.

*COVID-19 Conspiracy Statements Responses; Grouped on High and Low NC and NCC*

| Item veracity                      | Knowledge Test answers                     | NC   | NCC  | Mean % | 95% CI       |
|------------------------------------|--------------------------------------------|------|------|--------|--------------|
| Conspiracy statements<br>(7 items) | <i>"I am sure is true"</i>                 | High | High | 0.7    | [-0.3, 1.7]  |
|                                    |                                            | High | Low  | 0.0    | [0.0, 0.0]   |
|                                    |                                            | Low  | High | 0.0    | [0.0, 0.0]   |
|                                    |                                            | Low  | Low  | 0.3    | [-0.3, 0.8]  |
|                                    | <i>"I think this is true"</i>              | High | High | 1.4    | [0.0, 2.8]   |
|                                    |                                            | High | Low  | 1.3    | [-0.1, 2.7]  |
|                                    |                                            | Low  | High | 3.3    | [0.5, 6.0]   |
|                                    |                                            | Low  | Low  | 2.7    | [0.7, 4.8]   |
|                                    | <i>"I don't know"</i>                      | High | High | 4.4    | [-0.2, 9.1]  |
|                                    |                                            | High | Low  | 13.6   | [7.7, 19.4]  |
|                                    |                                            | Low  | High | 10.8   | [5.3, 16.2]  |
|                                    |                                            | Low  | Low  | 17.9   | [10.1, 25.6] |
|                                    | <i>"I think this is <b>not</b> true"</i>   | High | High | 12.9   | [6.5, 19.3]  |
|                                    |                                            | High | Low  | 20.1   | [13.6, 26.7] |
|                                    |                                            | Low  | High | 17.6   | [11.2, 23.9] |
|                                    |                                            | Low  | Low  | 28.3   | [20.0, 36.6] |
|                                    | <i>"I am sure this is <b>not</b> true"</i> | High | High | 80.6   | [72.7, 88.5] |
|                                    |                                            | High | Low  | 65.0   | [56.7, 73.4] |
|                                    |                                            | Low  | High | 68.4   | [59.5, 77.3] |
|                                    |                                            | Low  | Low  | 50.8   | [40.2, 61.5] |

Note. High and Low NC were determined by a median split of the scores. High and Low NCC based on the lower and upper quantiles of scores. Importantly, the interquartile range of NCC scores were excluded. Thus, the values in this table represent 50% of the original sample. Group sizes are 61 (Hi-NC, Hi-NCC), 78 (Hi-NC,Lo-NCC), 61 (Lo-NC, Hi-NCC), and 52 (Lo-NC, Lo-NCC).

Table 11.

*COVID-19 Negated Conspiracy Statement Responses; Grouped on High and Low NC and NCC*

| Item veracity                            | Knowledge Test answers                     | NC   | NCC  | Mean % | 95% CI       |
|------------------------------------------|--------------------------------------------|------|------|--------|--------------|
| Negated conspiracy statement<br>(1 item) | <i>"I am sure is true"</i>                 | High | High | 49.2   | [36.5, 61.8] |
|                                          |                                            | High | Low  | 33.3   | [22.8, 43.9] |
|                                          |                                            | Low  | High | 31.1   | [19.4, 42.9] |
|                                          |                                            | Low  | Low  | 17.3   | [6.9, 27.7]  |
|                                          | <i>"I think this is true"</i>              | High | High | 27.9   | [16.5, 39.2] |
|                                          |                                            | High | Low  | 34.6   | [24.0, 45.2] |
|                                          |                                            | Low  | High | 24.6   | [13.7, 35.5] |
|                                          |                                            | Low  | Low  | 30.8   | [18.1, 43.4] |
|                                          | <i>"I don't know"</i>                      | High | High | 11.5   | [3.4, 19.5]  |
|                                          |                                            | High | Low  | 12.8   | [5.4, 20.3]  |
|                                          |                                            | Low  | High | 24.6   | [13.7, 35.5] |
|                                          |                                            | Low  | Low  | 32.7   | [19.8, 45.6] |
|                                          | <i>"I think this is <b>not</b> true"</i>   | High | High | 3.3    | [-1.2, 7.8]  |
|                                          |                                            | High | Low  | 11.5   | [4.4, 18.7]  |
|                                          |                                            | Low  | High | 11.5   | [3.4, 19.5]  |
|                                          |                                            | Low  | Low  | 11.5   | [2.8, 20.3]  |
|                                          | <i>"I am sure this is <b>not</b> true"</i> | High | High | 8.2    | [1.3, 15.1]  |
|                                          |                                            | High | Low  | 7.7    | [1.7, 13.6]  |
|                                          |                                            | Low  | High | 8.2    | [1.3, 15.1]  |
|                                          |                                            | Low  | Low  | 7.7    | [0.4, 15.0]  |

Note. High and Low NC were determined by a median split of the scores. High and Low NCC are based on the lower and upper quantiles of scores. Importantly, the interquartile range of NCC scores were excluded. Thus, the values in this table represent 50% of the original sample. Group sizes are 61 (Hi-NC, Hi-NCC), 78 (Hi-NC,Lo-NCC), 61 (Lo-NC, Hi-NCC), and 52 (Lo-NC, Lo-NCC).

Tables 12-16: Demographic Details of Prolific Research Participants (Wave 2)

Table 12.

*Participant Demographics: Career Field (N = 326)*

| <b>Category</b>                                   | <b>n</b> | <b>%</b> |
|---------------------------------------------------|----------|----------|
| Student                                           | 59       | 18.1     |
| Information Technology                            | 47       | 14.4     |
| Unemployed                                        | 35       | 10.7     |
| Marketing, Sales, and Service                     | 27       | 8.3      |
| Health Science and Health Care                    | 24       | 7.4      |
| Science, Technology, Engineering, and Mathematics | 24       | 7.4      |
| Education and Training                            | 19       | 5.8      |
| Arts, Audio/Video Technology, and Communications  | 17       | 5.2      |
| Business Management and Administration            | 17       | 5.2      |
| Finance                                           | 13       | 4.0      |
| Government and Public Administration              | 9        | 2.8      |
| Manufacturing                                     | 9        | 2.8      |
| Human Services                                    | 7        | 2.1      |
| Transportation, Distribution, and Logistics       | 7        | 2.1      |
| Hospitality and Tourism                           | 6        | 1.8      |
| Law, Public Safety, Corrections, and Security     | 6        | 1.8      |
| Agriculture, Food and Natural Resources           | 2        | 0.6      |
| Architecture and Construction                     | 2        | 0.6      |
| Other: Retired                                    | 6        | 1.8      |
| Other (please specify)                            | 3        | 0.9      |

Note. \* Other career fields reported by individual participants were blogger, educational publishing, freelancer, internet analyst, risk analyst, sex worker, sports, telecoms, and writing. Participants could choose multiple career field topics, therefore n total is larger than the sample size.

Table 13.

*Participant Demographics: Education*

| <b>Highest educational achievement</b> | <b>n</b> | <b>%</b> |
|----------------------------------------|----------|----------|
| Bachelor's degree in college (4-year)  | 90       | 27.6     |
| High school graduate                   | 85       | 26.1     |
| Master's degree                        | 66       | 20.3     |
| Some college but no degree             | 56       | 17.2     |
| Associate degree in college (2-year)   | 17       | 5.2      |
| Professional degree (JD, MD)           | 7        | 2.2      |
| Less than high school degree           | 4        | 1.2      |
| Doctoral degree                        | 1        | 0.3      |

Table 14.

*Participant Demographics: Nationality*

| <b>Nationality</b>       | <b>n</b> | <b>%</b> |
|--------------------------|----------|----------|
| United Kingdom           | 108      | 33.1     |
| United States of America | 53       | 16.3     |
| Poland                   | 46       | 14.1     |
| Portugal                 | 39       | 12.0     |
| Greece                   | 12       | 3.7      |
| Italy                    | 8        | 2.5      |
| Canada                   | 7        | 2.2      |
| Hungary                  | 7        | 2.2      |
| Spain                    | 7        | 2.2      |
| Estonia                  | 4        | 1.2      |
| Australia                | 3        | 0.9      |
| France                   | 3        | 0.9      |
| India                    | 3        | 0.9      |
| Netherlands              | 3        | 0.9      |
| Brazil                   | 2        | 0.6      |
| Israel                   | 2        | 0.6      |
| South Africa             | 2        | 0.6      |
| Other*                   | 17       | 5.2      |

Note. \* Other countries reported by individual participants: Armenia, Austria, Belgium, Chile, Czech Republic, Finland, Germany, Indonesia, Ireland, Latvia, Lithuania, Mexico, New Zealand, Nigeria, Romania, Slovenia, and Switzerland.

Table 15.

*Participant Demographics: Native Language*

| <b>Native language</b> | <b>n</b> | <b>%</b> |
|------------------------|----------|----------|
| English                | 173      | 53.1     |
| Polish                 | 46       | 14.1     |
| Portuguese             | 39       | 12.0     |
| Greek                  | 11       | 3.4      |
| Spanish                | 9        | 2.8      |
| Hungarian              | 7        | 2.2      |
| Italian                | 7        | 2.2      |
| Dutch                  | 4        | 1.2      |
| Estonian               | 4        | 1.2      |
| French                 | 3        | 0.9      |
| German                 | 3        | 0.9      |
| Hebrew                 | 2        | 0.6      |
| Other*                 | 18       | 5.5      |

Note. \* Other native languages reported by individual participants: Arabic, Armenian, Bengali, Czech, Danish, Finnish, Hindi, Indonesian, Kiswahili, Korean, Latvian, Lithuanian, Malayalam, Romanian, Russian, Scottish, Slovenian, Ukrainian, and Urdu.

Table 16.

*Participant Demographics: Gender Identity*

| <b>Gender</b>        | <b>n</b> | <b>%</b> |
|----------------------|----------|----------|
| Male                 | 167      | 51.2     |
| Female               | 154      | 47.2     |
| Prefer not to say    | 2        | 0.6      |
| Transgender          | 1        | 0.3      |
| Other: not specified | 1        | 0.3      |
| Other: genderqueer   | 1        | 0.3      |
| Other: nonbinary     | 167      | 51.2     |

Table 17: COVID-19 Knowledge Test (Wave 2, N=326)

Table 17.

*Wave 2: Descriptive Statistics COVID-19 Knowledge Test (N = 326)*

| <b>Item veracity</b>                  | <b>Knowledge Test answers</b>       | <b>Mean percentage</b> | <b>SD</b> | <b>95% CI</b> | <b>Min</b>                       | <b>Max</b> |
|---------------------------------------|-------------------------------------|------------------------|-----------|---------------|----------------------------------|------------|
| True statements (16 items)            | "I am sure this is true"            | 43.5                   | 20.9      | [41.3, 45.8]  | 0                                | 16/16      |
|                                       | "I think this is true"              | 29.8                   | 17.3      | [28.0, 31.7]  | 0                                | 14/16      |
|                                       | "I don't know"                      | 14.4                   | 10.5      | [13.3, 15.5]  | 0                                | 9/16       |
|                                       | "I think this is <b>not</b> true"   | 8.0                    | 8.1       | [7.1, 8.9]    | 0                                | 10/16      |
|                                       | "I am sure this is <b>not</b> true" | 4.2                    | 8.7       | [3.3, 5.2]    | 0                                | 16/16      |
| False statements (16 items)           | "I am sure this is true"            | 5.1                    | 6.4       | 4.4 5.8]      | 0                                | 6/16       |
|                                       | "I think this is true"              | 12.5                   | 9.4       | [11.5, 13.6]  | 0                                | 9/16       |
|                                       | "I don't know"                      | 14.5                   | 12.8      | [13.1, 15.9]  | 0                                | 10/16      |
|                                       | "I think this is <b>not</b> true"   | 22.4                   | 15.7      | [20.7, 24.1]  | 0                                | 13/16      |
|                                       | "I am sure this is <b>not</b> true" | 45.5                   | 21.5      | [43.2, 47.8]  | 0                                | 16/16      |
| Conspiracy statements (7 items)       | "I am sure this is true"            | 0.9                    | 4.7       | [0.4, 1.4]    | 0                                | 3/7        |
|                                       | "I think this is true"              | 3.2                    | 10.5      | [2.1, 4.4]    | 0                                | 5/7        |
|                                       | "I don't know"                      | 11.3                   | 22.3      | [8.8, 13.7]   | 0                                | 7/7        |
|                                       | "I think this is <b>not</b> true"   | 19.4                   | 26.9      | [16.5, 22.3]  | 0                                | 7/7        |
|                                       | "I am sure this is <b>not</b> true" | 65.2                   | 37.1      | [61.1, 69.2]  | 0                                | 7/7        |
| Negated conspiracy statement (1 item) | "I am sure this is true"            | 26.7                   | 44.3      | [21.9, 31.5]  | Not applicable for a single item |            |
|                                       | "I think this is true"              | 26.7                   | 44.3      | [21.9, 31.5]  |                                  |            |
|                                       | "I don't know"                      | 22.7                   | 42.0      | [18.1, 27.3]  |                                  |            |
|                                       | "I think this is <b>not</b> true"   | 12.9                   | 33.6      | [9.2, 16.5]   |                                  |            |
|                                       | "I am sure this is <b>not</b> true" | 11.0                   | 31.4      | [7.6, 14.5]   |                                  |            |
